# Supplementary material
Source: PubMed Central journal article supplement (PMC3081654)
Supplement: NIHMS72347-supplement-Supplementary_figure_1.pdf [file NIHMS72347-supplement-Supplementary_figure_1.pdf]

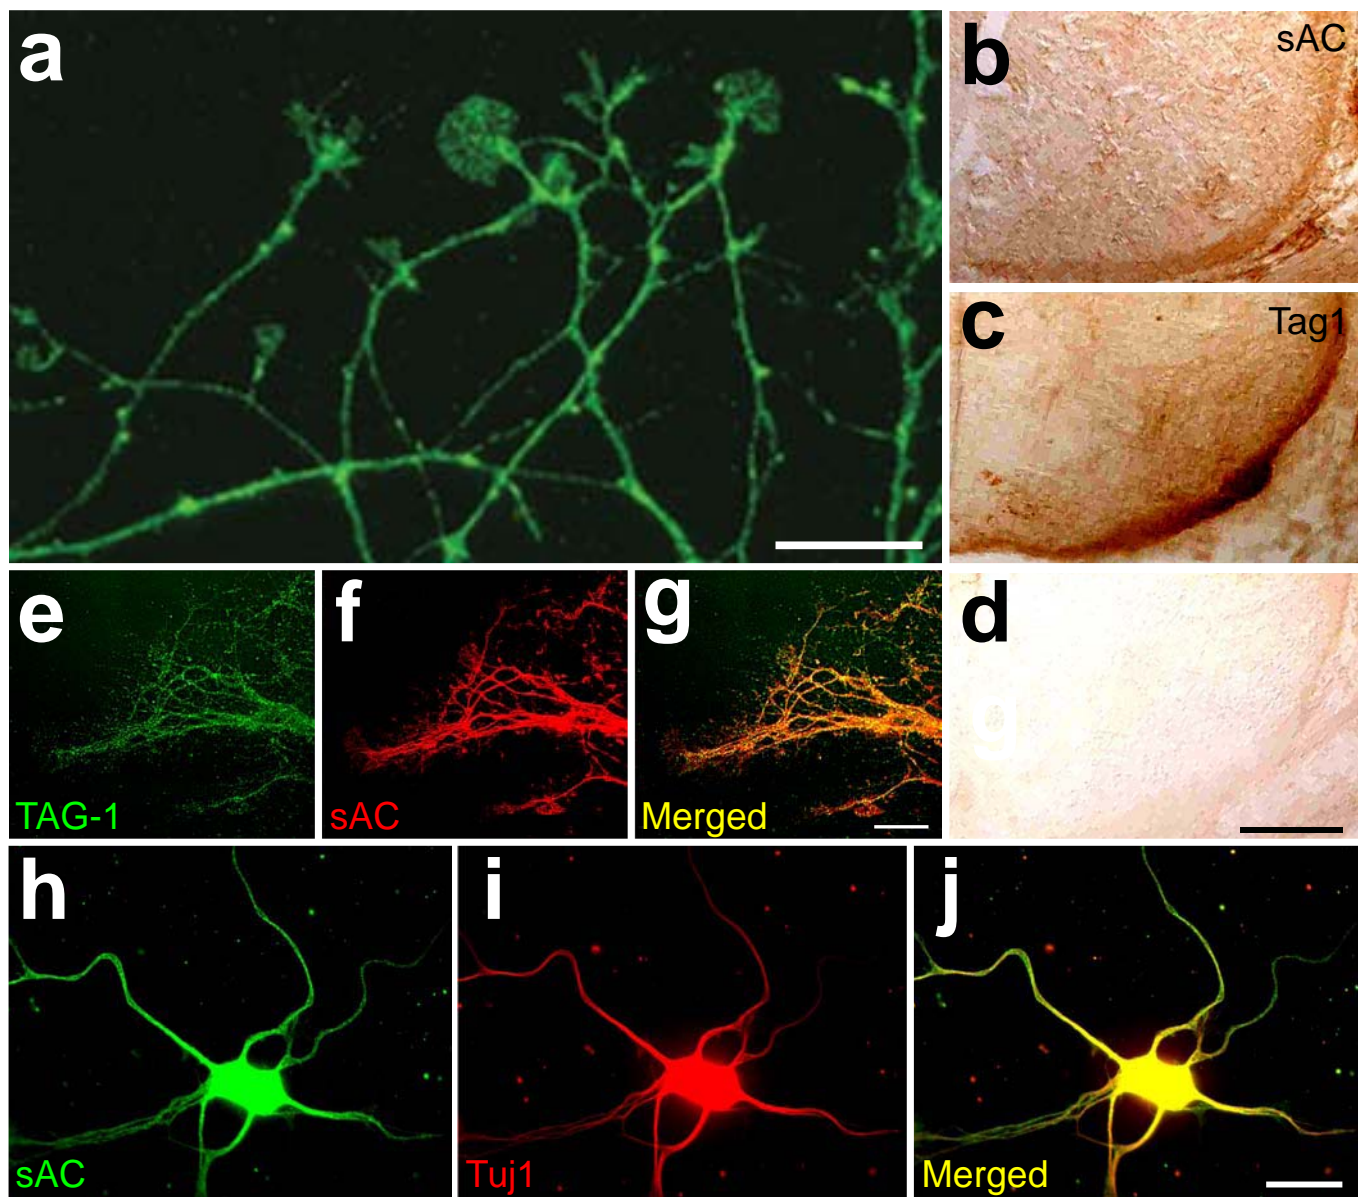

**Supplementary Figure 1.** Expression of sAC in rat neurons. (a) E15 rat DRG explant cultures (DIV 3) were labeled with an anti-sAC antibody (R37), that is directed against aa 435-466 of human sAC. Similar to R21 staining (Fig. 1a-c), sAC immunoreactivity (green) was detected throughout the axon and the central portion of the growth cone. Scale bar 40  $\mu$ m. (b-d) (b) E15 rat spinal cord sections were labeled with anti-sAC (R37). (c) Commissural axon tracts in the spinal cord were labeled with anti-Tag-1. (d) Control spinal cord immunostaining with no primary antibody. Scale bar 100  $\mu$ m. (e-g) All sAC-positive axons are commissural axons. (e) The commissural axons in the E15 rat DSC explant cultures were labeled with an anti-TAG-1 antibody (green). (f) Axons were stained with antibody directed against sAC (red). (g) Overlay of (e) and (f). Scale bar 20  $\mu$ m. (h-j) sAC immunoreactivity was detected in dendrites and axons of stage III rat hippocampal neurons. (h) sAC (green) was detected using anti-sAC (R37). (i) Neurites were labeled with an antibody directed against Tuj1 (red). (j) Overlay of (h) and (i). Scale bar 20  $\mu$ m.
