# Supplementary material
Source: PubMed Central journal article supplement (PMC3081654)
Supplement: NIHMS72347-supplement-Supplementary_figure_3.pdf [file NIHMS72347-supplement-Supplementary_figure_3.pdf]

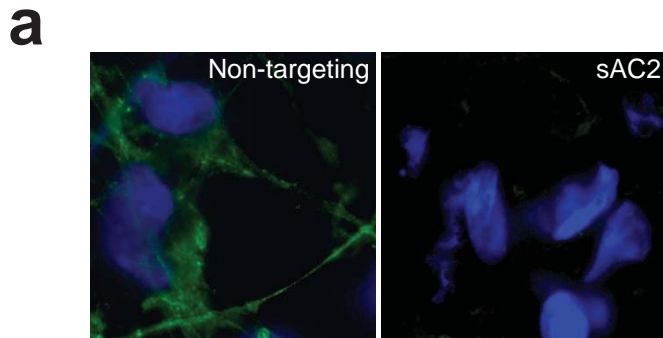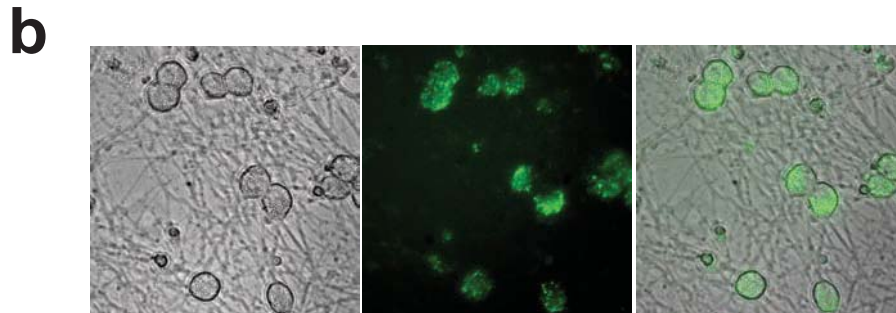

**Supplementary Figure 3.** DRG neurons are susceptible to highly efficient siRNA-mediated mRNA knockdown. **(a)** DRG neurons transfected with either non-targeting siRNA or sAC2 siRNA were labeled with anti-sAC (green) 48 h after transfection. DRG nuclei were co-labeled with DAPI (blue). Transfection of siRNA directed against sAC exon 5 (sAC2) induces significant knockdown of sAC protein in the axons and cell bodies of DRG neurons. **(b)** The incorporation of siRNAs into DRGs was verified by fluorescence microscopy in neurons transfected with a non-targeting Alexa-488 conjugated siRNA. Left, a phase-contrast image of DRG neurons 48 h after siRNA transfection. Middle, fluorescence image of the same neurons when excited by 488 nm argon laser. Right, overlay of the phase-contrast and fluorescence images.

Supplementary Fig. 3 Wu *et al.* (Jaffrey)
