# Supplementary material
Source: PubMed Central journal article supplement (PMC3081654)
Supplement: NIHMS72347-supplement-Supplementary_figure_4.pdf [file NIHMS72347-supplement-Supplementary_figure_4.pdf]

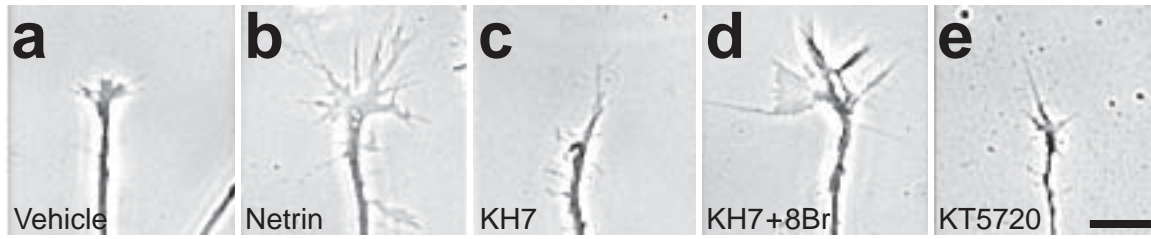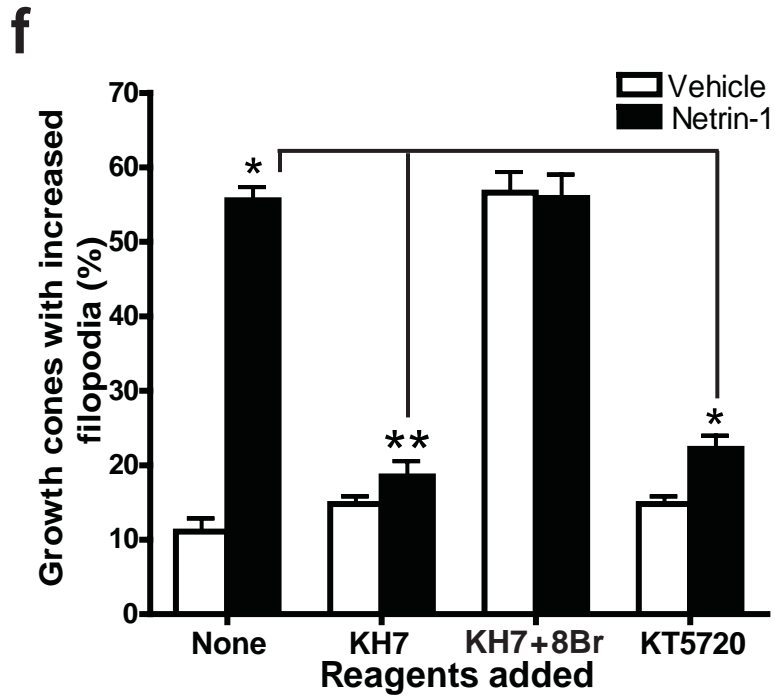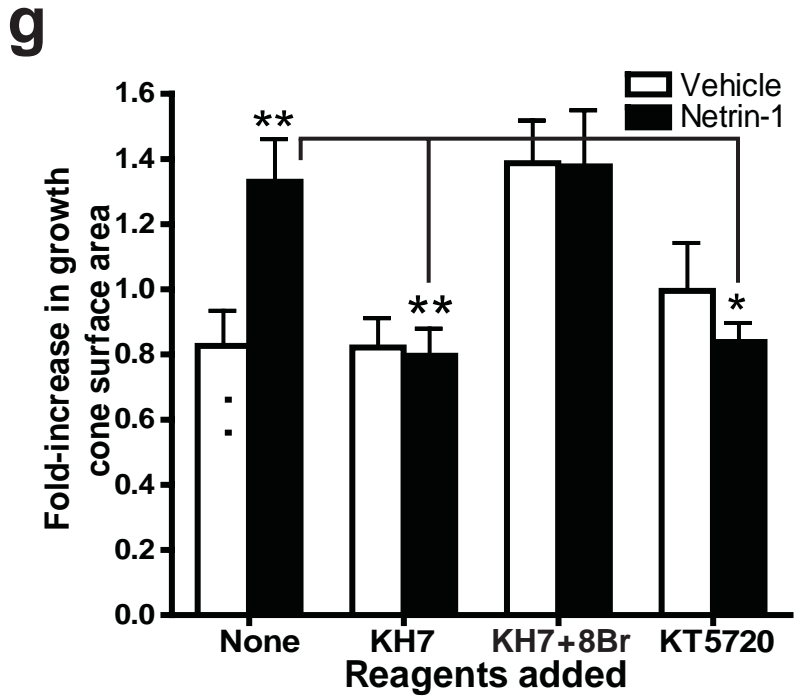

**Supplementary Figure 4.** Netrin-1-mediated growth cone elaboration requires cAMP and PKA. E15 DRG explant cultures (DIV 3) were pretreated with the indicated drug for 30 min and the morphology of individual growth cones were measured at 0 and 60 min following netrin-1 (300 ng ml<sup>-1</sup>) or vehicle treatment. (a,b) Phase-contrast images of DRG growth cones 60 min after the addition of (a) vehicle and (b) netrin-1. (c,d) Netrin-1-induced growth cone outgrowth at 60 min is blocked by pretreatment with KH7 (3 μM) (c) and rescued with 8-bromo-cAMP (8Br, 3 μM) (d). (e) Netrin-1-induced growth cone outgrowth at 60 min is also blocked by pretreatment with the PKA-inhibitor KT5720 (1 μM). Scale bar 10 μm. (f) Quantification of percent of growth cones with increased filopodia after 60 min for a-e. n = 50 growth cones from 3 different experiments. (g) Quantification of fold-increase in growth cone size after 60 min for a-e. n = 27 growth cones from three different experiments. \* P < 0.01 and \*\* P < 0.001. Error bars represent s.e.m.

Supplementary Fig. 4 Wu *et al.* (Jaffrey)
