# Supplementary material
Source: PubMed Central journal article supplement (PMC3081654)
Supplement: NIHMS72347-supplement-Supplementary_figure_5.pdf [file NIHMS72347-supplement-Supplementary_figure_5.pdf]

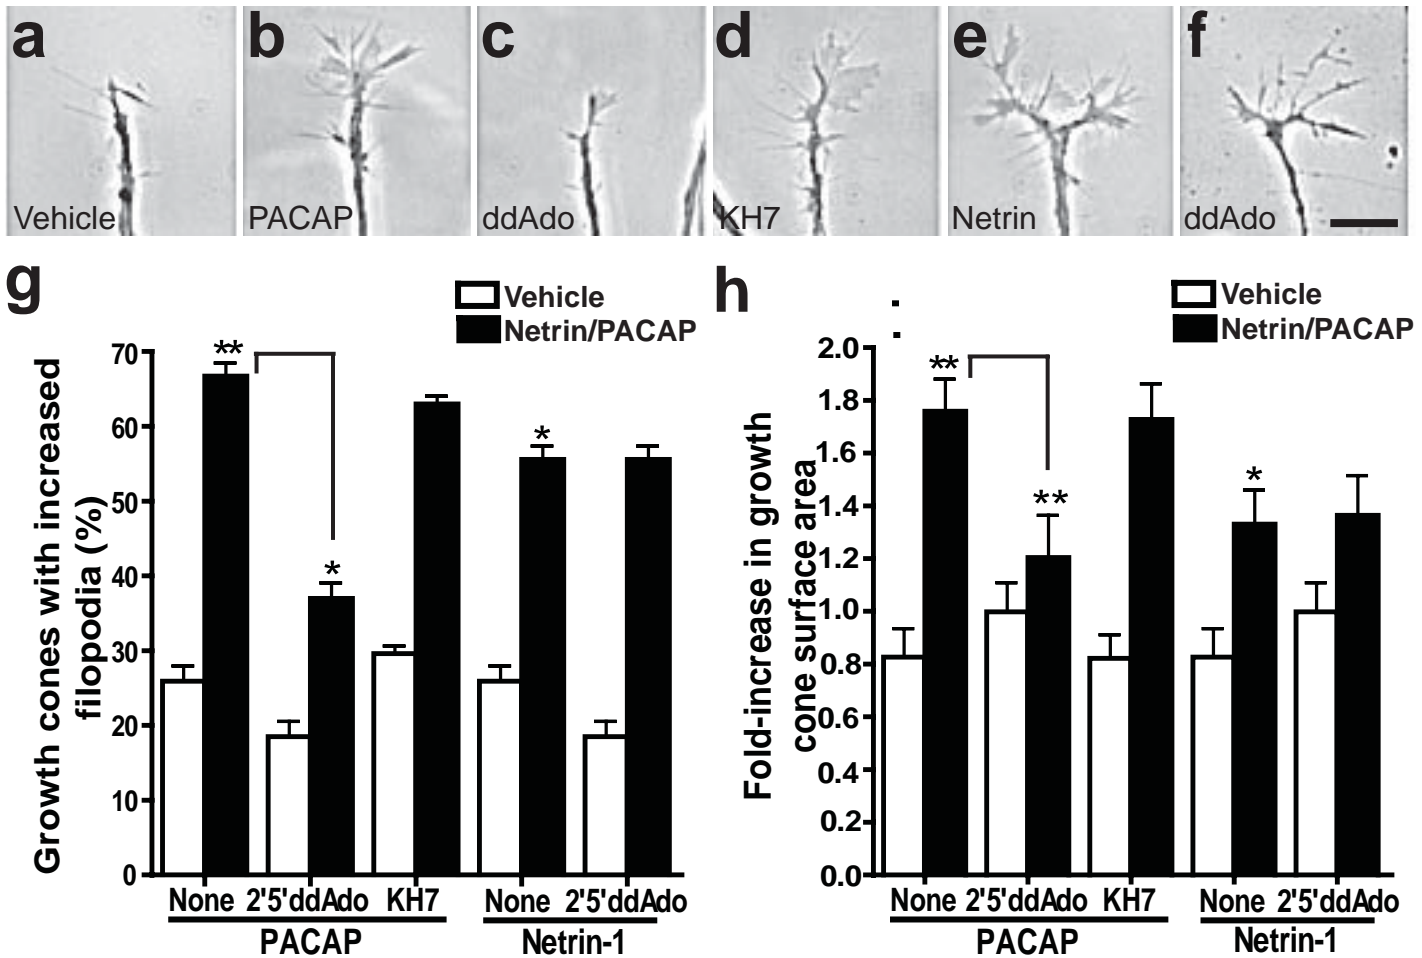

**Supplementary Figure 5.** Differentiation of the roles of tmAC and sAC in growth cone signaling. E15 DRG explant cultures (DIV 3) were pretreated with the indicated drug for 30 min and the morphology of individual growth cones were measured at 0 and 60 min following netrin-1 (300 ng ml<sup>-1</sup>), PACAP (10 nM), or vehicle treatment. The tmAC inhibitor 2',5'-ddAdo does not affect netrin-1-mediated growth cone elaboration, but does block PACAP-mediated growth cone elaboration. (a,b) Phase-contrast images of DRG growth cones 60 min after the addition of (a) vehicle and (b) PACAP. (c,d) PACAP-induced growth cone outgrowth is blocked by 2',5'-ddAdo (50 μM) (c) but not blocked by pretreatment with KH7 (3 μM) (d). (e,f) Netrin-1-induced growth cone elaboration (e), is not blocked by pretreatment with 2',5'-ddAdo (f). Scale bar 10 μm. (g) Quantification of percent of growth cones with increased filopodia after 60 min for a-f. *n* = 50 growth cones from three different experiments. (h) Quantification of fold-increase in growth cone size after 60 min for a-f. *n* = 27 growth cones from three different experiments. \* *P* < 0.01 and \*\* *P* < 0.001. Error bars represent s.e.m.
