# Supplementary material
Source: PubMed Central journal article supplement (PMC3081654)
Supplement: NIHMS72347-supplement-Supplementary_figure_6.pdf [file NIHMS72347-supplement-Supplementary_figure_6.pdf]

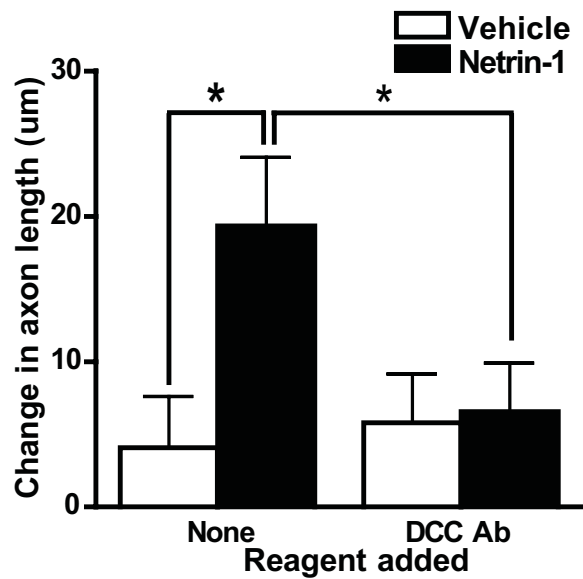

**Supplementary Figure 6.** Netrin-1 mediates axon outgrowth through DCC. E15 DSC explants cultured on PDL/fibronectin substratum (DIV4) were pretreated with DCC-neutralizing antibody for 30 min and axon outgrowth was measured at 0 h and 3 h following netrin-1 ( $75 \text{ ng ml}^{-1}$ ) or vehicle treatment. Netrin-1-induced axon outgrowth is blocked by pretreatment with DCC-neutralizing antibody ( $1 \text{ } \mu\text{g ml}^{-1}$ ).  $n = 36$  spinal cord axons. \*  $P$  value  $< 0.01$ . Error bars represent s.e.m.

Supplementary Fig. 6 Wu *et al.* (Jaffrey)
