# Supplementary material
Source: PubMed Central journal article supplement (PMC3081654)
Supplement: NIHMS72347-supplement-Supplementary_figure_7.pdf [file NIHMS72347-supplement-Supplementary_figure_7.pdf]

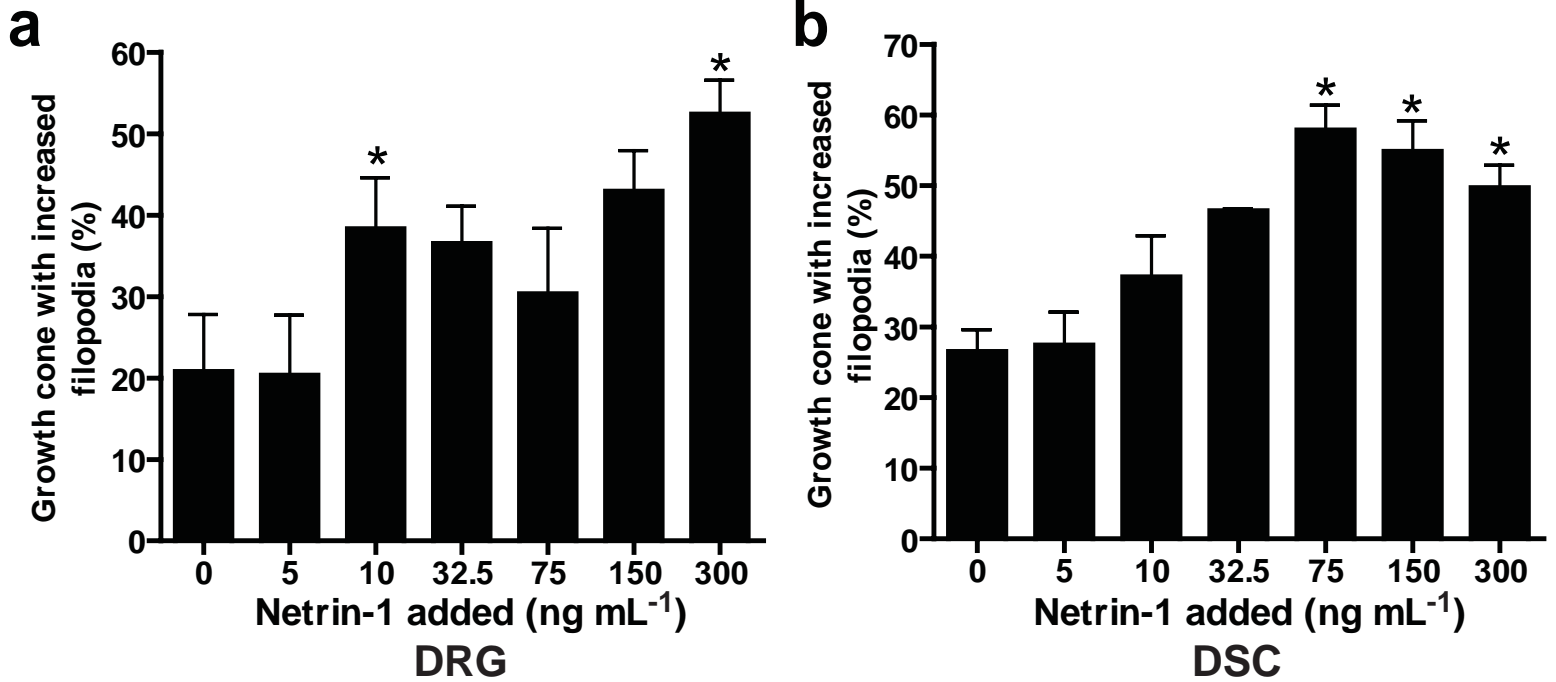

**Supplementary Figure 7.** Netrin-1 mediates growth cone elaboration in a dose-dependent manner. (a) Quantification of percent of E15 DRG growth cones with increased filopodia after 60 min treatment with different concentration of netrin-1 (0-300 ng ml<sup>-1</sup>). Netrin-1 maximally stimulates DRG neuron at 300 ng ml<sup>-1</sup>. (b) Quantification of percent of E15 DSC growth cones with increased filopodia after 60 min treatment with different concentration of netrin-1 (0-300 ng ml<sup>-1</sup>). Netrin-1 maximally stimulates DSC growth cones at 75 ng ml<sup>-1</sup>.

Supplementary Fig. 7 Wu *et al.* (Jaffrey)
